# Supplementary material
Source: Elsevier journal article supplement (https://www.sciencedirect.com/science/article/pii/S0014256514002045)
Supplement: mmc1 [file S0014256514002045:mmc1.docx]

**Respuesta correcta: 4**

**Eritema multiforme por *Mycoplasma genitalium*.**

El eritema multiforme (EM) es una enfermedad aguda, autolimitada, a veces recurrente, que puede ser una reacción de hipersensibilidad tipo IV asociada a ciertas infecciones, medicamentos, y otros factores desencadenantes1. Las lesiones de EM son bien conocidas por su forma característica y curso autolimitado en unos 7-14 días.

El agente causal más frecuentemente implicado en el EM es el virus del herpes simple (VHS)2, seguido de *Mycoplasma pneumoníae*.3 En el paciente descrito se identificó un patógeno de esta familia: *Mycoplasma genitalium*. Las lesiones iniciales eran pápulas eritematosas que evolucionaron a lesiones maculares con el característico aspecto en diana.4

Las formas más graves del EM son el Síndrome de Stevens-Johnson y la necrosis epidérmica tóxica. Ambas formas clínicas se acompañan de una marcada afectación del estado general, con compromiso de mucosas y despegamiento epidérmico (<10 % en el Síndrome de Stevens-Johnson y >30% en la necrosis epidérmica tóxica 5 Este último proceso suele requerir una actuación terapéutica similar al de un gran quemado.

**Bibliografía:**

1. Fritsch PO, Ruiz-Maldonado R, Erythema multiforme. Stevens-Johnson syndrome and toxic epidermal necrolysis. In: Freedberg IM, Irwin M, Eisen AZ, Wolff K, Austen KF, Goldsmith LA, Katz SI, editores. *Fitzpatrick's Dermatology in General Medicine*. 6º Edición. Nueva York: McGraw-Hill; 2003:543-57.

2. Huff JC. Erythema multiforme and latent herpes simplex infection. *Semin Dermatol*. Sep 1992;11:207-10.

3. Grosber M, Alexandre M, Poszepczynska-Guigne E, Revuz J, Roujeau JC. Recurrent erythema multiforme in association with recurrent Mycoplasma pneumonia infections. *J Am Acad Dermatol*. May 2007;56:S118-9

4. Schofield JK, Tatnall FM, Brown J, McCloskey D, Navarrete C, Leigh IM. Recurrent erythema multiforme: tissue typing in a large series of patients. *Br J Dermatol*. Oct 1994;131:532-5.

5. Bastuji-Garin S, Rzany B, Stern RS, Shear NH, Naldi L, Roujeau JC. Clinical classification of cases of toxic epidermal necrolysis, Stevens-Johnson syndrome, and erythema multiforme. *Arch Dermatol*. Jan 1993;129:92-6
